# Supplementary material
Source: MDPI journal article supplement (https://www.mdpi.com/2076-0760/12/5/303)
Supplement: s1 [file s1]

# Does the Region Make a Difference? Social Inequality in Transitions to Adulthood across Cohorts in West Germany

**Table S1.** Correlation between regional variables. Data: Federal Employment Agency, Federal Statistical Office, German Council of Science and Humanities, BBSR.

|                          | Classic univ. town | Supply with study fields | Unemployment |
|--------------------------|--------------------|--------------------------|--------------|
| Classic univ. town       | 1.0                |                          |              |
| Supply with study fields | 0.463              | 1.0                      |              |
| Unemployment             | -0.171             | 0.097                    | 1.0          |

**Table S2.** Discrete-time event history LPM on the probability of entering university within the first five years after school graduation (AME)

| <i>Individual level</i>                                                    | <i>Model 1</i>             | <i>Model 2</i>             | <i>Model 3</i>             |
|----------------------------------------------------------------------------|----------------------------|----------------------------|----------------------------|
| Baseline (year of graduation and one year after) ( <i>Ref. year 2-5</i> )  | <b>0.013**</b><br>(0.006)  | 0.018<br>(0.017)           | 0.018<br>(0.017)           |
| Parents ISEI (combined max.)                                               | <b>0.008***</b><br>(0.001) | <b>0.005***</b><br>(0.001) | <b>0.009***</b><br>(0.002) |
| Parents' education school (combined max.) intermediate ( <i>Ref. low</i> ) |                            | 0.053<br>(0.041)           | 0.053<br>(0.041)           |
| Parents' education school (combined max.) high ( <i>Ref. low</i> )         |                            | <b>0.131***</b><br>(0.044) | <b>0.120***</b><br>(0.044) |
| Migration background ( <i>Ref. no mig. background</i> )                    |                            | <b>0.087**</b><br>(0.034)  | <b>0.083**</b><br>(0.035)  |
| Sex (female)                                                               |                            | -0.036<br>(0.031)          | -0.038<br>(0.031)          |
| Year (1986-2011)                                                           |                            | 0.002<br>(0.002)           | 0.001<br>(0.002)           |
| Final grade                                                                |                            | <b>0.195***</b><br>(0.017) | <b>0.179***</b><br>(0.021) |
| <i>Regional level</i>                                                      |                            |                            |                            |
| Supply of study fields (45 min. travel time)                               |                            | <b>0.015***</b><br>(0.008) | <b>0.025***</b><br>(0.003) |
| Classic university town (45 min. travel time)                              |                            | <b>0.067**</b><br>(0.027)  | <b>0.032**</b><br>(0.006)  |
| Unemployment rate (15 min. travel time)                                    |                            | <b>0.012**</b><br>(0.005)  | <b>0.011**</b><br>(0.006)  |
| Upper-level secondary school graduates (45 min. travel time)               |                            | 0.006<br>(0.005)           | 0.001<br>(0.005)           |
| Supply of study fields (45 min. travel time)* ISEI parents                 |                            |                            | <b>-0.003*</b><br>(0.001)  |
| Classic university town (45 min. travel time) * ISEI parents               |                            |                            | 0.006<br>(0.001)           |
| Unemployment rate (15 min. travel time) * ISEI parents                     |                            |                            | <b>0.002*</b><br>(0.001)   |
| McFadden's Pseudo R <sup>2</sup>                                           | 0.0531                     | 0.1221                     | 0.1356                     |
| N person years<br>(n individuals)                                          | 3,479<br>(1,854)           | 3,479<br>(1,854)           | 3,479 (1,854)              |

Presented are average marginal effects (AMEs); clustered S.E. in parentheses, significance level: \*p<0.05, \*\*p<0.005, \*\*\*p<0.001, additionally controlled for federal states(dummies); data: NEPS-SC6, Federal Employment Agency, Federal Statistical Office, German Council of Science and Humanities, BBSR; Additionally included: federal states (dummies) to account for institutional specifications

**Table S3.** LPM on the probability of staying in the home region to study (AME)

| <i>Individual level</i>                                                                                                                                                                                                                                                                                                                                                                                   | <i>Model 1</i>   | <i>Model 2</i>             | <i>Model 3</i>             |
|-----------------------------------------------------------------------------------------------------------------------------------------------------------------------------------------------------------------------------------------------------------------------------------------------------------------------------------------------------------------------------------------------------------|------------------|----------------------------|----------------------------|
| Parents ISEI (combined max.)                                                                                                                                                                                                                                                                                                                                                                              | 0.002<br>(0.012) | 0.002<br>(0.002)           | 0.002<br>(0.015)           |
| Parents' education school (combined max.) intermediate ( <i>Ref. low</i> )                                                                                                                                                                                                                                                                                                                                |                  | -0.047<br>(0.058)          | -0.016<br>(0.010)          |
| Parents' education school (combined max.) high ( <i>Ref. low</i> )                                                                                                                                                                                                                                                                                                                                        |                  | <b>0.107**</b><br>(0.061)  | <b>0.109**</b><br>(0.061)  |
| Migration background ( <i>Ref. no mig. background</i> )                                                                                                                                                                                                                                                                                                                                                   |                  | <b>-0.118**</b><br>(0.044) | <b>0.119**</b><br>(0.044)  |
| Sex (female)                                                                                                                                                                                                                                                                                                                                                                                              |                  | 0.008<br>(0.039)           | 0.019<br>(0.036)           |
| Year (1986-2011)                                                                                                                                                                                                                                                                                                                                                                                          |                  | -0.002<br>(0.003)          | -0.003<br>(0.003)          |
| Final grade                                                                                                                                                                                                                                                                                                                                                                                               |                  | 0.016<br>(0.030)           | 0.017<br>(0.030)           |
| <i>Regional level</i>                                                                                                                                                                                                                                                                                                                                                                                     |                  |                            |                            |
| Supply of study fields (45 min. travel time)                                                                                                                                                                                                                                                                                                                                                              |                  | <b>0.017***</b><br>(0.007) | <b>0.016***</b><br>(0.004) |
| Classic university town (45 min. travel time)                                                                                                                                                                                                                                                                                                                                                             |                  | <b>0.174***</b><br>(0.008) | <b>0.049**</b><br>(0.015)  |
| Unemployment rate (15 min. travel time)                                                                                                                                                                                                                                                                                                                                                                   |                  | <b>-0.005*</b><br>(0.001)  | <b>-0.005*</b><br>(0.002)  |
| Upper-level secondary school graduates (45 min. travel time)                                                                                                                                                                                                                                                                                                                                              |                  | 0.0001***<br>(0.000)       | 0.0001***<br>(0.000)       |
| Supply of study fields (45 min. travel time)* ISEI parents                                                                                                                                                                                                                                                                                                                                                |                  |                            | 0.001<br>(0.001)           |
| Classic university town (45 min. travel time) * ISEI parents                                                                                                                                                                                                                                                                                                                                              |                  |                            | 0.004<br>(0.002)           |
| Unemployment rate (15 min. travel time) * ISEI parents                                                                                                                                                                                                                                                                                                                                                    |                  |                            | 0.002<br>(0.003)           |
| McFadden's Pseudo R <sup>2</sup>                                                                                                                                                                                                                                                                                                                                                                          | 0.002            | 0.3551                     | 0.3595                     |
| N person years<br>(n individuals)                                                                                                                                                                                                                                                                                                                                                                         | 1,149            | 1,149                      | 1,149                      |
| Presented are average marginal effects (AMEs); clustered S.E. in parentheses, significance level: *p<0.05, **p<0.005, ***p<0.001, additionally controlled for federal states(dummies); data: NEPS-SC6, Federal Employment Agency, Federal Statistical Office, German Council of Science and Humanities, BBSR; Additionally included: federal states (dummies) to account for institutional specifications |                  |                            |                            |

Interactions UAS vs. Uni/VET

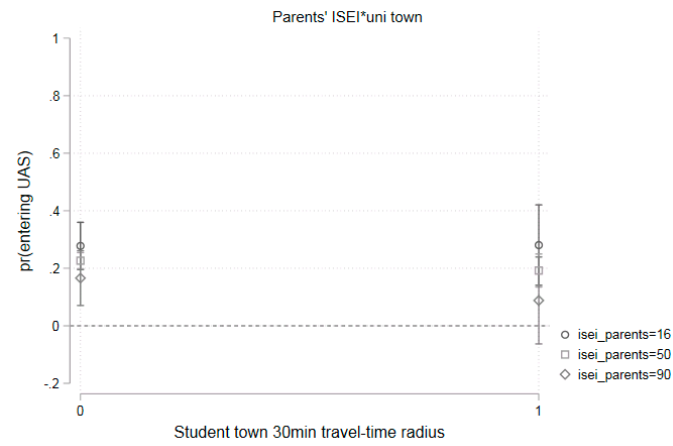

(a)

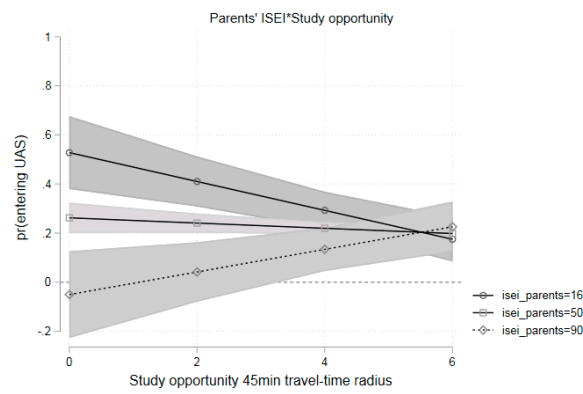

(b)

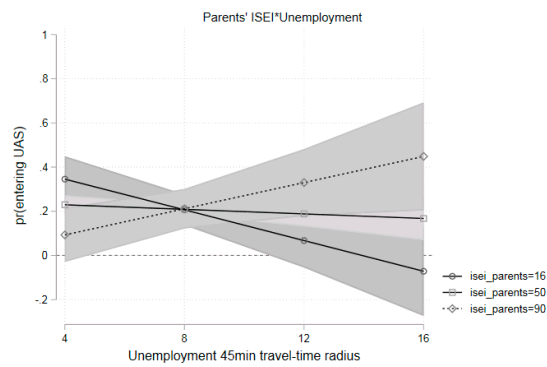

(c)

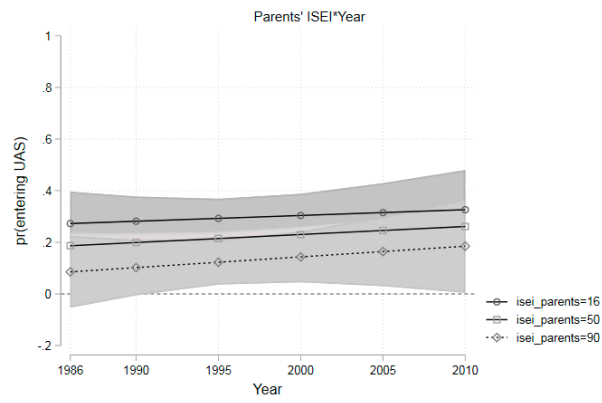

(d)

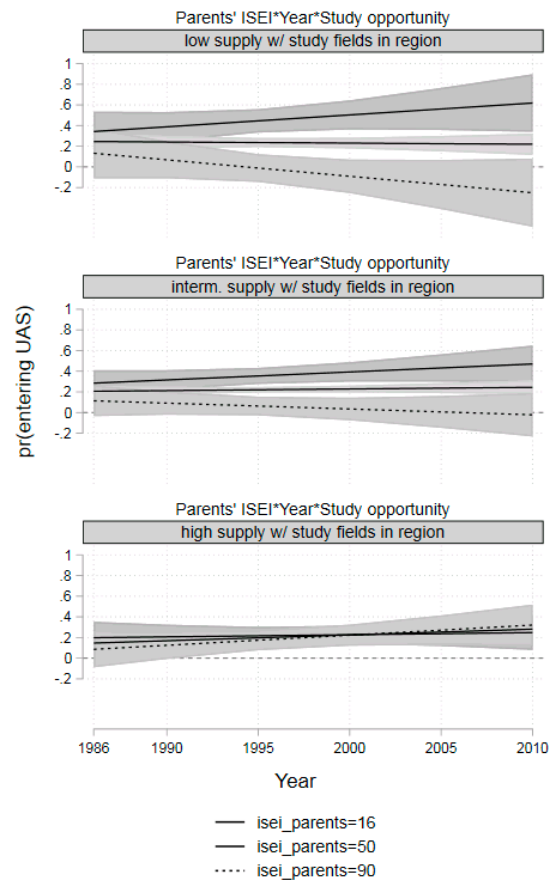

(e)

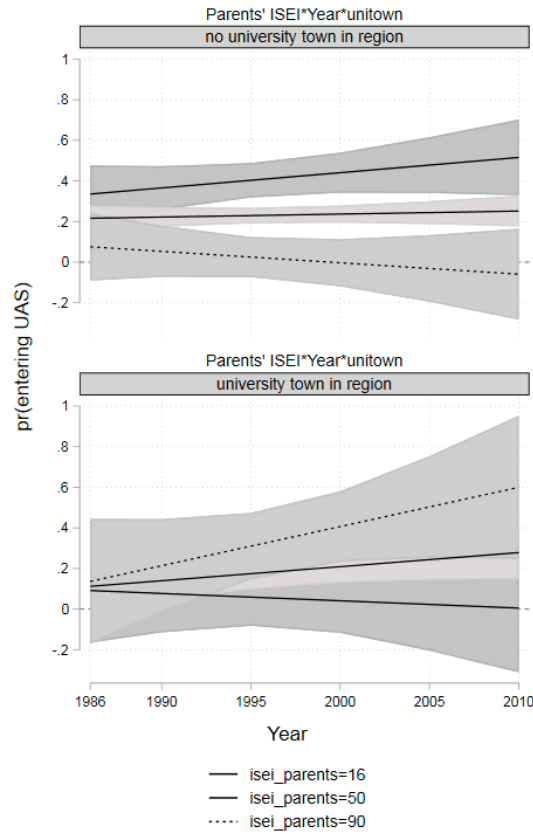

(f)

**Figure S1.** (a) Predicted probabilities; interaction parents' ISEI and classic university town in 45-min travel time radius on probability of entering UAS (vs. uni or VET). Data: NEPS-SC6, Federal Employment Agency, Federal Statistical Office, German Council of Science and Humanities;  $n=1,854$ . (b) Predicted probabilities; interaction parents' ISEI and fields of study available in 45-min travel time radius on the probability of entering UAS (vs. uni or VET). Data: NEPS-SC6, Federal Employment Agency, Federal Statistical Office, German Council of Science and Humanities,  $n=1,854$ . (c) Predicted probabilities; interaction parents' ISEI and unemployment in 45-min travel time radius on probability of entering UAS (vs. uni or VET). Data: NEPS-SC6, Federal Employment Agency, Federal Statistical Office, German Council of Science and Humanities,  $n=1,854$ . (d) Predicted probabilities; interaction parents' ISEI and observation time on probability of entering UAS (vs. uni or VET). Data: NEPS-SC6, Federal Employment Agency, Federal Statistical Office, German Council of Science and Humanities,  $n=1,854$ . (e) Predicted probabilities; three-way interaction parents' ISEI, supply w/ study fields in region and time on probability of entering UAS (vs. uni or VET). Data: NEPS-SC6, Federal Employment Agency, Federal Statistical Office, German Council of Science and Humanities,  $n=1,854$ . (f) Predicted probabilities; three-way interaction parents' ISEI, university town in region and time on probability of entering UAS (vs. uni or VET). Data: NEPS-SC6, Federal Employment Agency, Federal Statistical Office, German Council of Science and Humanities,  $n=1,854$ .

Interactions VET vs. Uni/UAS

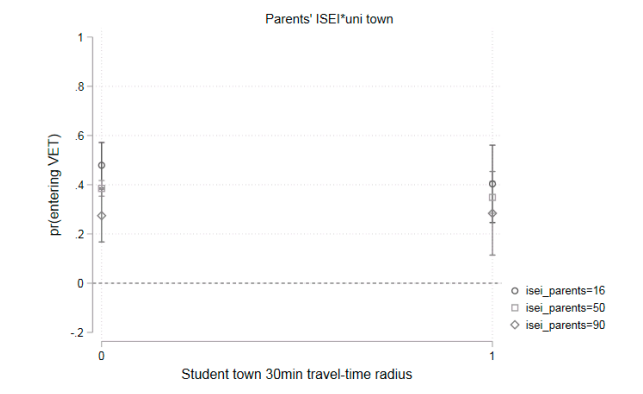

(a)

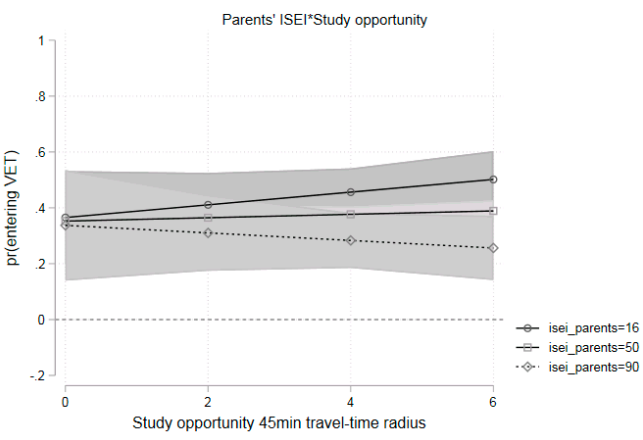

(b)

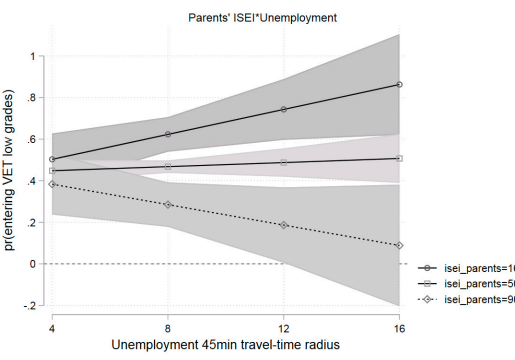

(c)

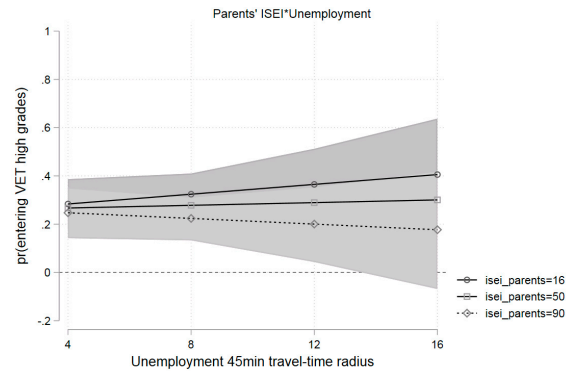

(d)

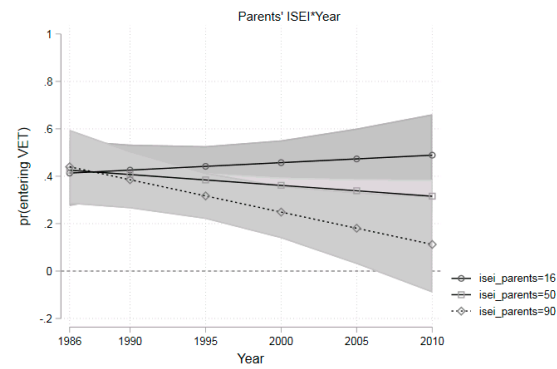

(e)

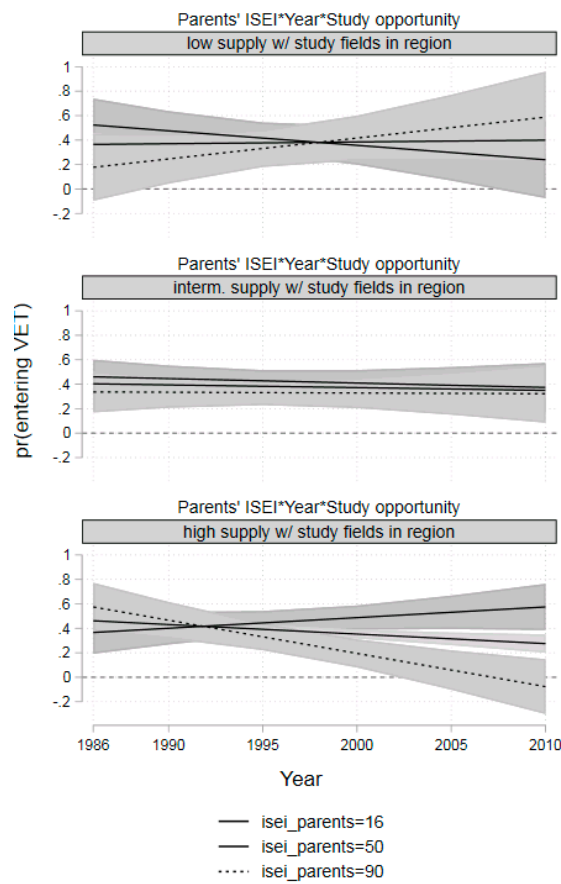

(f)



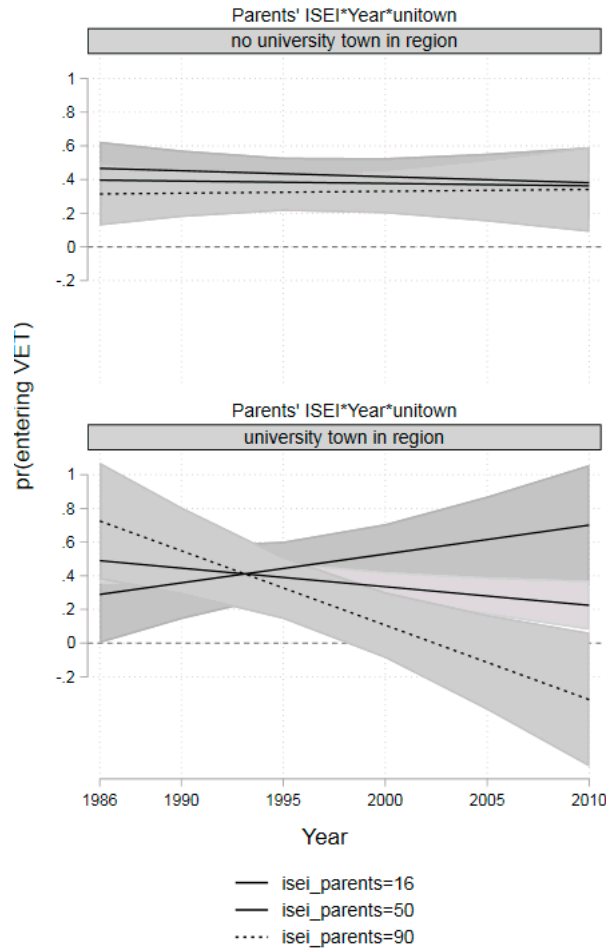

(g)

**Figure S2.** (a) Predicted probabilities; interaction parents' ISEI and classic university town in 45-min travel time radius on probability of entering VET (vs. uni or UAS). Data: NEPS-SC6, Federal Employment Agency, Federal Statistical Office, German Council of Science and Humanities,  $n=1,854$ . (b) Predicted probabilities; interaction parents' ISEI and fields of study available in 45-min travel time radius on the probability of entering VET (vs. uni or UAS). Data: NEPS-SC6, Federal Employment Agency, Federal Statistical Office, German Council of Science and Humanities,  $n=1,854$ . (c) Predicted probabilities; interaction parents' ISEI and unemployment in 45-min travel time radius on probability of entering VET (vs. uni or UAS) for students with grades below average. Data: NEPS-SC6, Federal Employment Agency, Federal Statistical Office, German Council of Science and Humanities,  $n=1,854$ . (d) Predicted probabilities; interaction parents' ISEI and unemployment in 45-min travel time radius on probability of entering VET (vs. uni or UAS) for students with grades above average. Data: NEPS-SC6, Federal Employment Agency, Federal Statistical Office, German Council of Science and Humanities,  $n=1,854$ . (e) Predicted probabilities; interaction parents' ISEI and unemployment in 45-min travel time radius on probability of entering VET (vs. uni or UAS). Data: NEPS-SC6, Federal Employment Agency, Federal Statistical Office, German Council of Science and Humanities,  $n=1,854$ . (f). Predicted probabilities; three-way interaction parents' ISEI, supply w/ study fields in region and time on probability of entering VET (vs. UAS or uni). Data: NEPS-SC6, Federal Employment Agency, Federal Statistical Office, German Council of Science and Humanities,  $n=1,854$ . (g) . Predicted probabilities; three-way interaction parents' ISEI, university town in region and time on probability of entering VET (vs. UAS or uni). Data: NEPS-SC6, Federal Employment Agency, Federal Statistical Office, German Council of Science and Humanities,  $n=1,854$ .
